# Supplementary material for: Potential of Exopolysaccharide from Porphyridium marinum to Contend with Bacterial Proliferation, Biofilm Formation, and Breast Cancer
Source: MDPI journal article supplement (doi:10.3390/md19020066), 2021-01-27

## Supplementary Material

HPAEC chromatograms of native (a: EPS-0C) and depolymerized EPS (b: EPS-2C, c: EPS-5C)

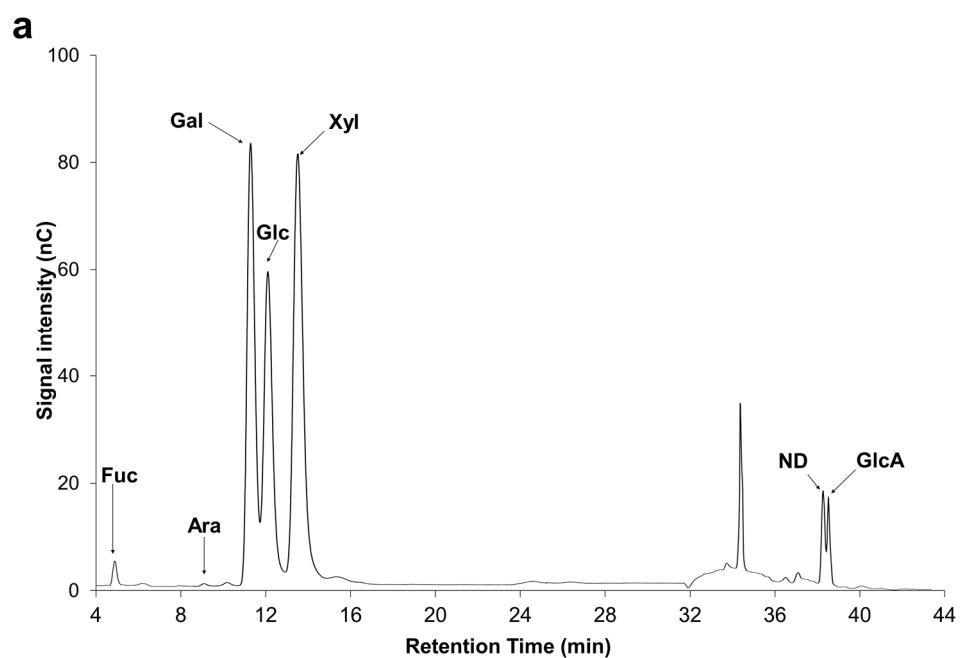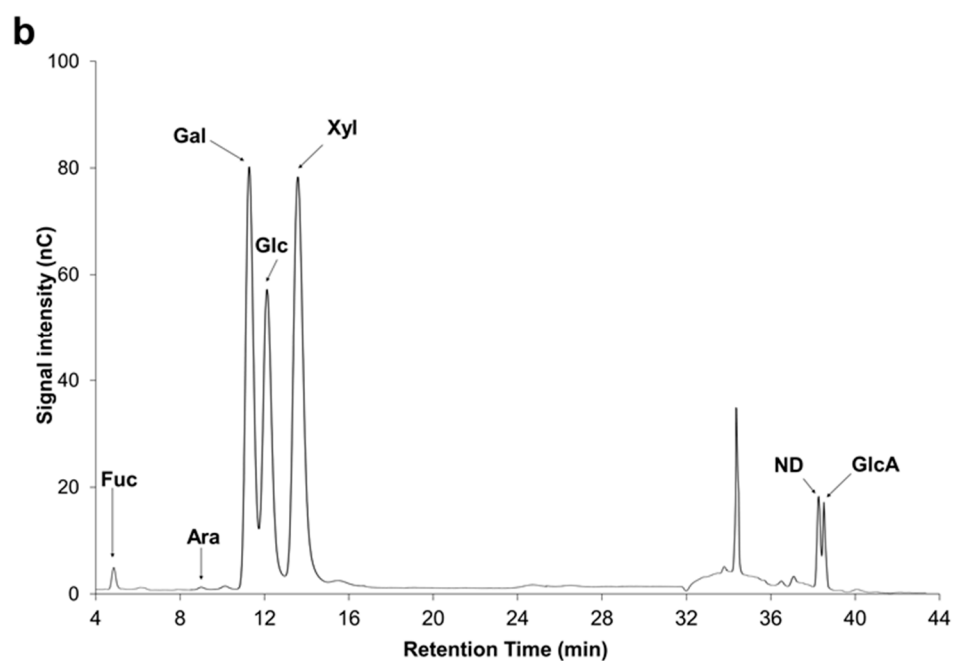

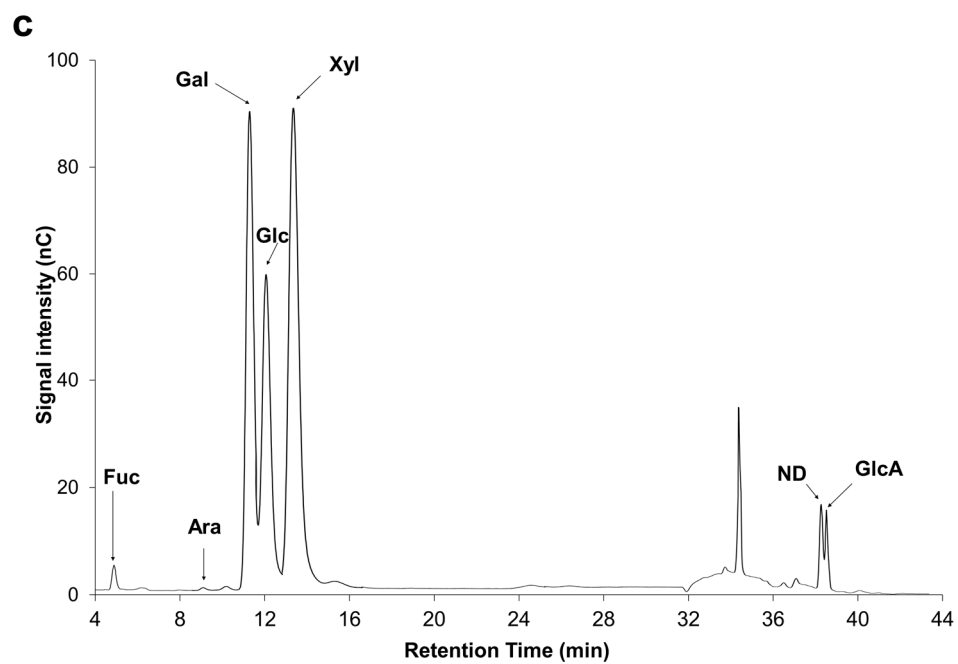

Supplement: s1 [file s1]
